# Supplementary material for: Porous tantalum cage loaded with CGF promotes interbody fusion in a rat XLIF model
Source: Research Square preprint supplement (doi:10.21203/rs.3.rs-7337688/v1), 2025-08-29
Supplement: Supplementary file 1 [file 689294510e3b08a168710ac4.docx]

**Supplementary information**

**Porous tantalum cage loaded with CGF promotes interbody fusion in a rat XLIF model**

Han Wua; Weijian Wanga; Shaorong Lia; Jianshi Songa; Sidong Yangb; Qiang Yangc;Liang Lib;Ruixin Zhend;Haoyu Wua;Wei Zhangb*

agraduate school, Hebei Medical University, Shijiazhuang, Hebei, China; bDepartment of Spine Surgery, The Third hospital of Hebei Medical University, Shijiazhuang, Hebei,China;cDepartment of Spine Surgery, Tianjin Hospital, Tianjin University, Tianjin, China; dHealth Management Centre, The First Hospital of Hebei Medical University, Shijiazhuang, Hebei, China

**Address correspondence to**: Wei Zhang, Department of Spine Surgery, The Third Hospital of Hebei Medical University, 139 Ziqiang Street[, Shijiazhuang, 050031, 37300332@hebmu.edu.cn](mailto:,%20Shijiazhuang,%20050031,%2037300332@hebmu.edu.cn), 0311-88602382


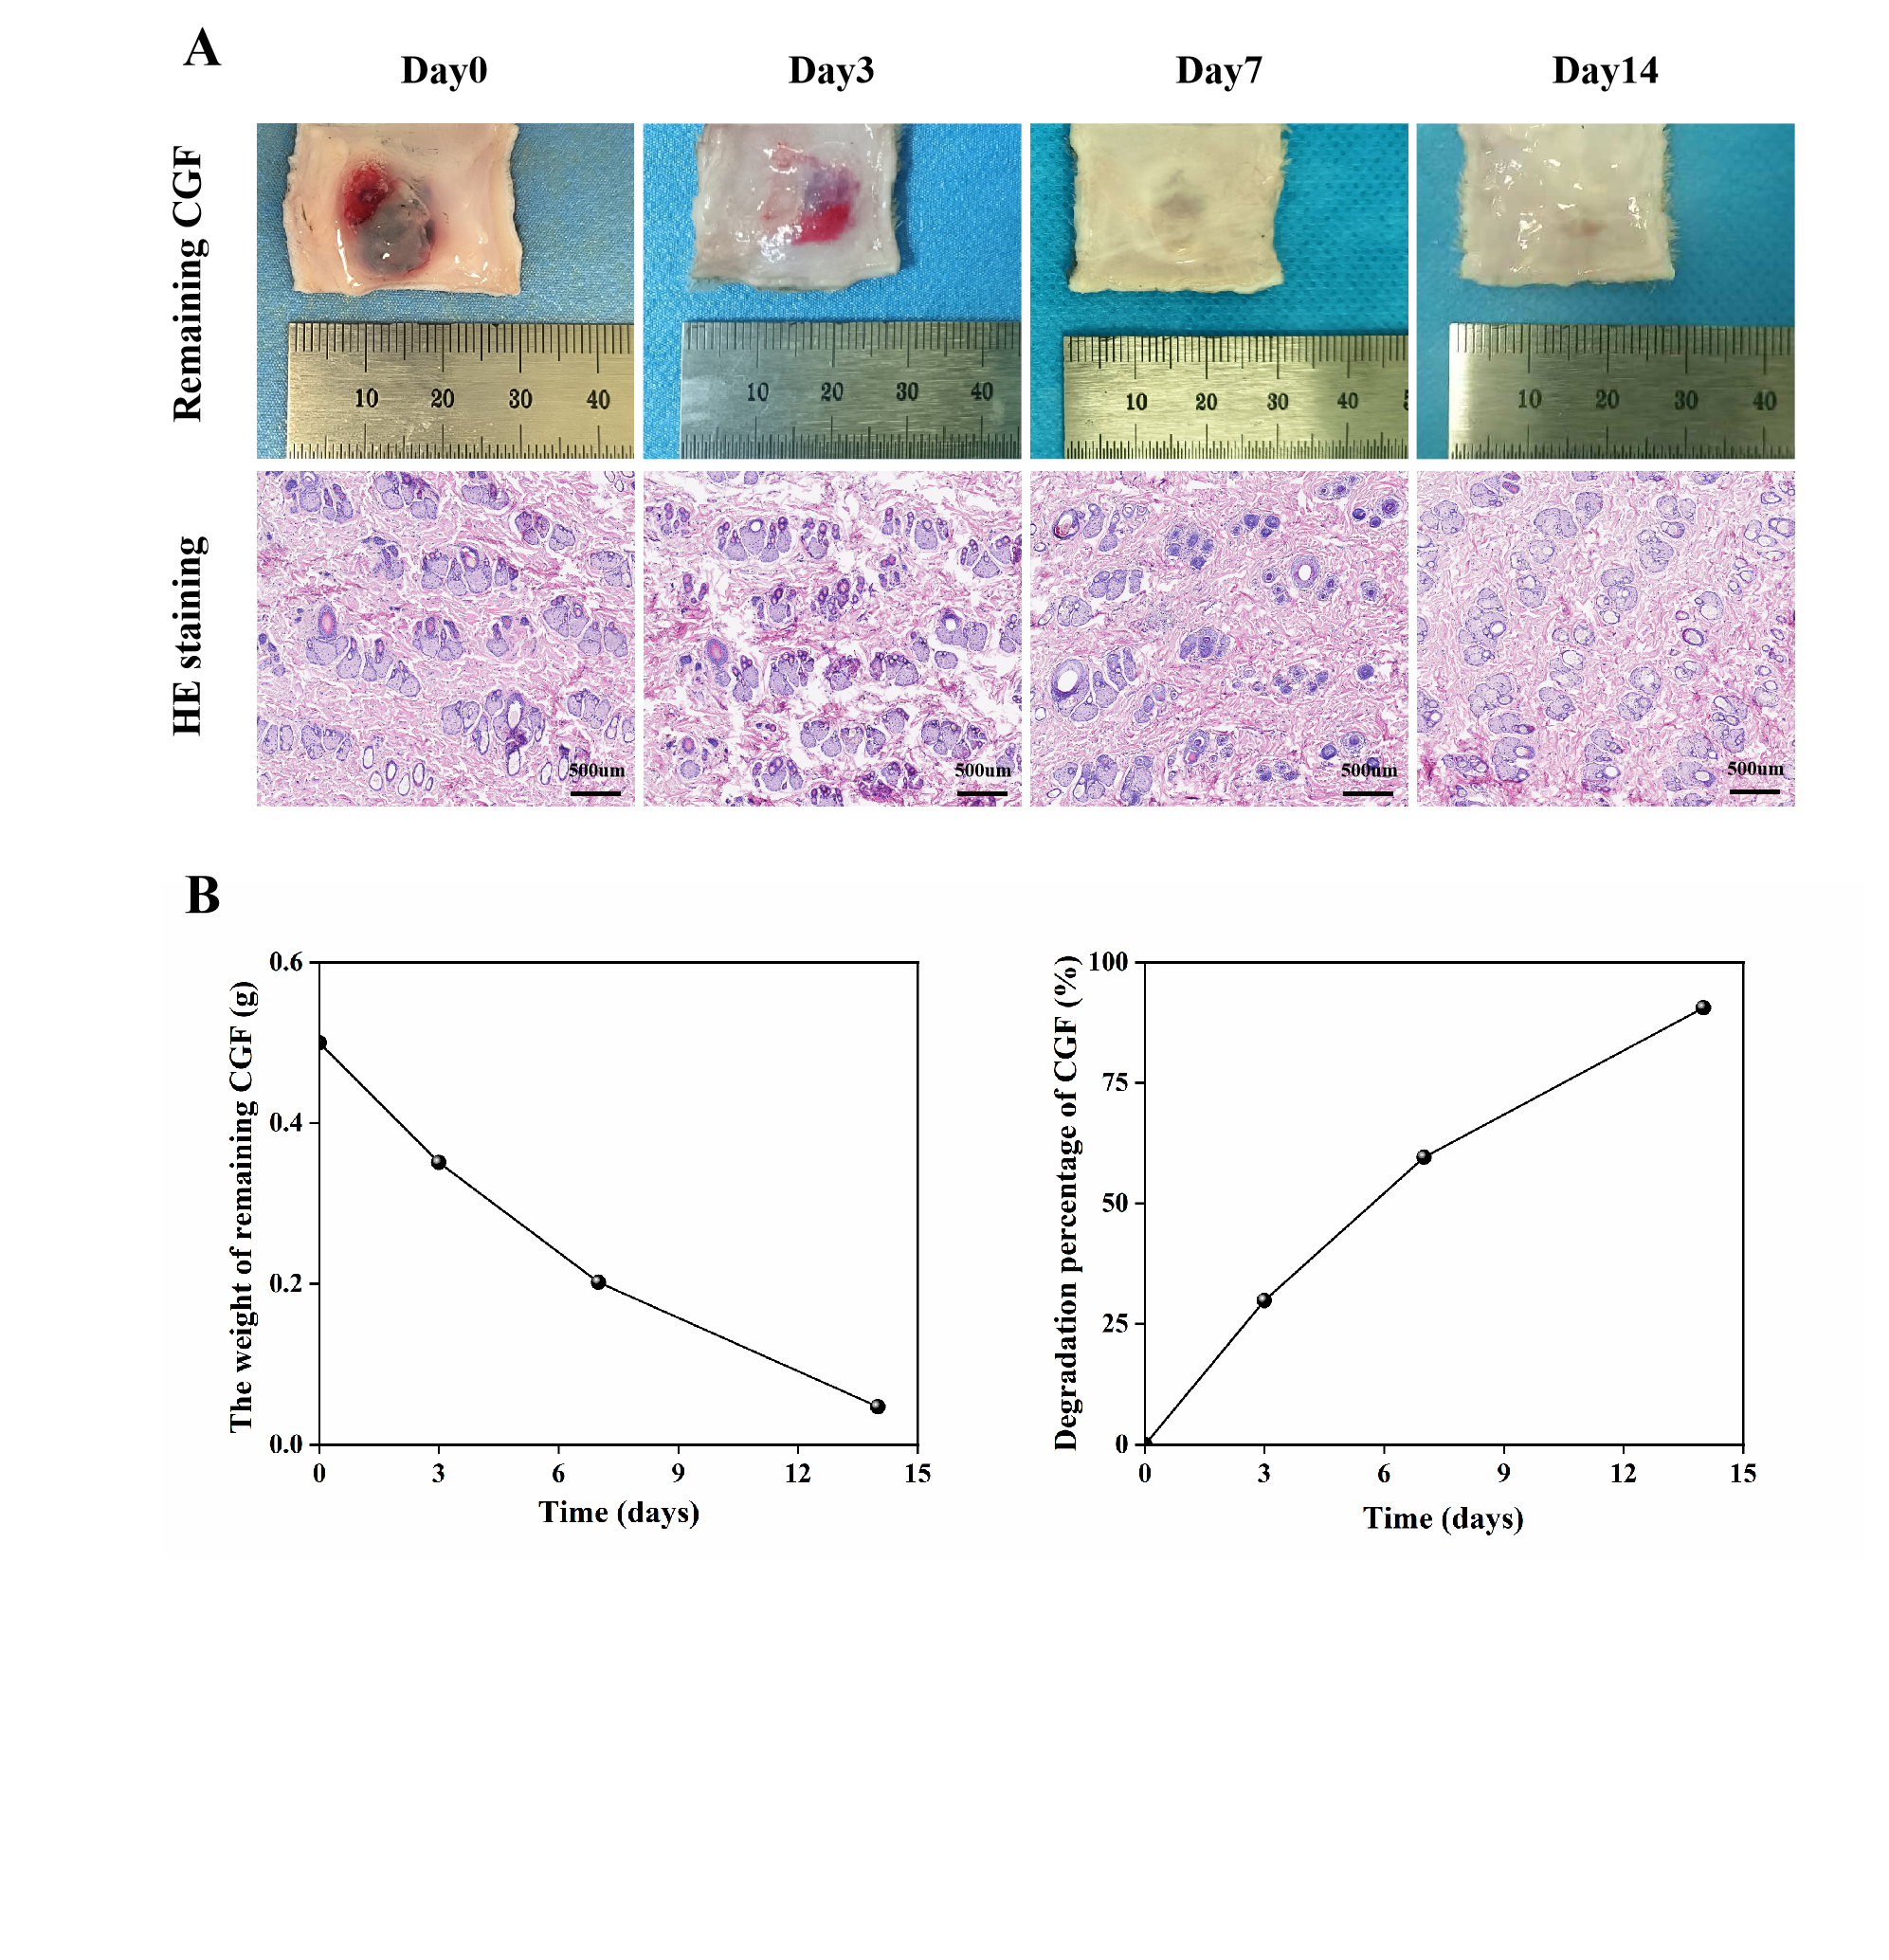


Fig. S1. Degradation and local tissue biocompatibility evaluation of CGF. (A) Residual CGF gel and corresponding HE staining images at days 0, 3, 7, and 14 post-implantation. (n = 3) (B) In vivo degradation curve of CGF gel from day 0 to 14.


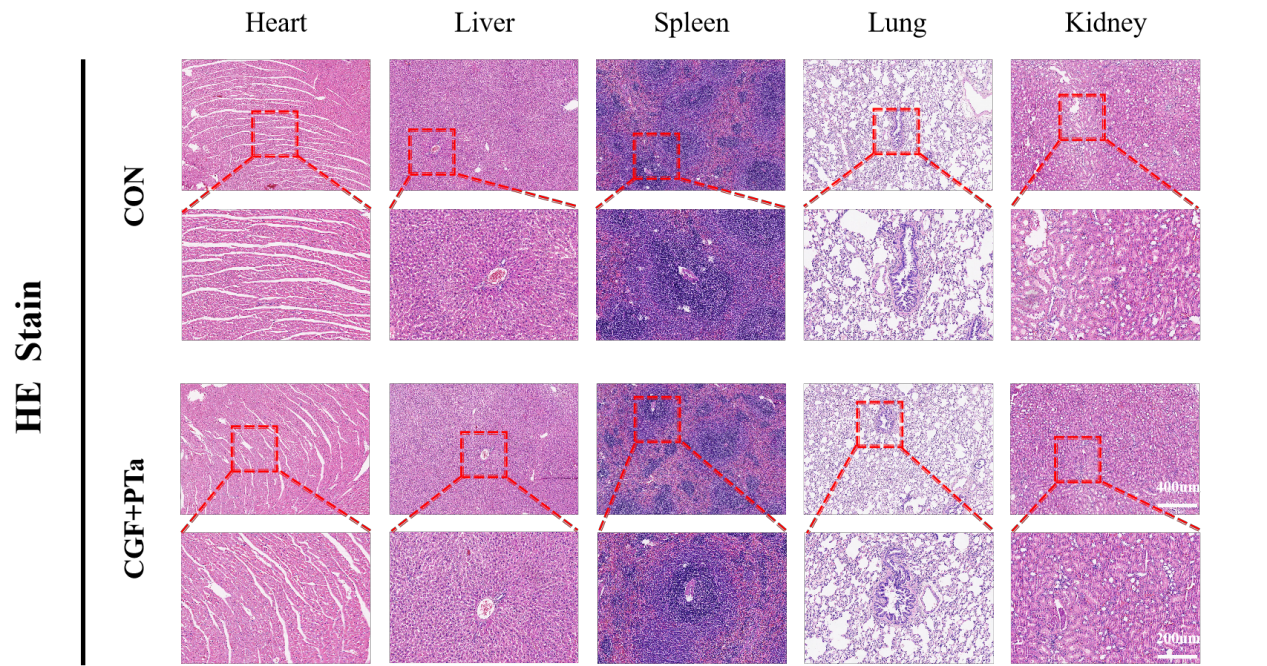


Fig. S2. Histological observation of heart, liver, spleen, lung, and kidney tissues by HE staining in CGF-PTa and control SD rats at 2 months postoperatively.
